# Supplementary material for: Locus-specific LINE-1 expression in clinical ovarian cancer specimens at the single-cell level
Source: PubMed Central journal article supplement (PMC10881972; doi:10.1038/s41598-024-54113-w), 2024-02-21
Supplement: 41598_2024_54113_MOESM1_ESM.pdf [file 41598_2024_54113_MOESM1_ESM.pdf]

# Locus-specific LINE-1 expression in clinical ovarian cancer specimens at the single-cell level

**Anna Perkiö<sup>1</sup>, Barun Pradhan<sup>1,a,b</sup>, Fatih Genc<sup>1</sup>, Anna Pirttikoski<sup>1</sup>, Sanna Pikkusaari<sup>1</sup>, Erdogan Pekcan Erkan<sup>1,c</sup>, Matias Marin Falco<sup>1</sup>, Kaisa Huhtinen<sup>1,2</sup>, Sara Narva<sup>3</sup>, Johanna Hynninen<sup>3</sup>, Liisa Kauppi<sup>1,\*</sup> and Anna Vähärautio<sup>1,4\*</sup>**

1 Research Program in Systems Oncology, Research Programs Unit, Faculty of Medicine, University of Helsinki, Helsinki, 00290, Finland

2 Institute of Biomedicine and FICAN West Cancer Centre, University of Turku and Turku University Hospital, 20521 Turku, Finland

3 Department of Obstetrics and Gynecology, University of Turku and Turku University Hospital, 20521 Turku, Finland

4 Foundation for the Finnish Cancer Institute (FCI), Helsinki, Finland

a Current affiliation: Sandra and Edward Meyer Cancer Center, Weill Cornell Medicine, New York, NY, USA

b Current affiliation: New York Genome Center, New York, NY, USA

c Current affiliation: Faculty of Medicine and Health Technology, Tampere University, Tampere, Finland

\* Correspondence: [liisa.kauppi@helsinki.fi](mailto:liisa.kauppi@helsinki.fi) (L.K.), [anna.vaharautio@helsinki.fi](mailto:anna.vaharautio@helsinki.fi) (A.V.)

## Supplementary information

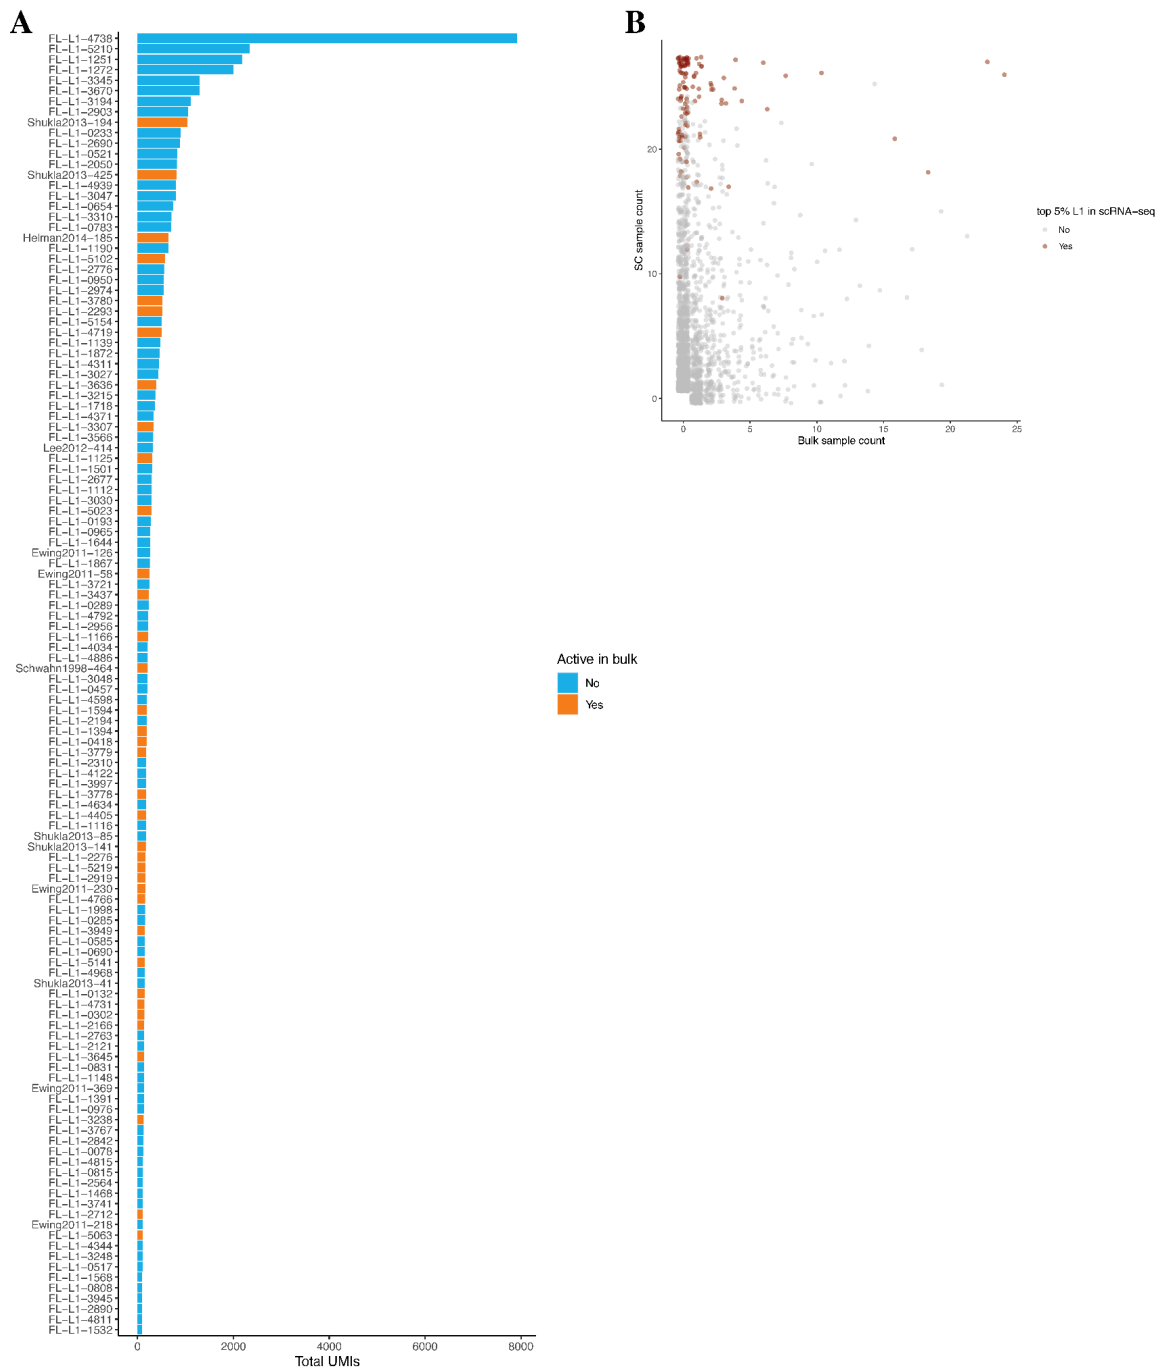

**Supplementary Figure 1. A.** Total number of UMIs per LI in unnormalized single cell dataset. LIs that were also detected in bulk RNA-seq are marked in orange. **B.** The number of LI-expressing samples in bulk and scRNA-seq data. One dot corresponds to a single LI locus. The most active LIs of the scRNA-seq (top 5% based on total UMI count) are marked in blue.

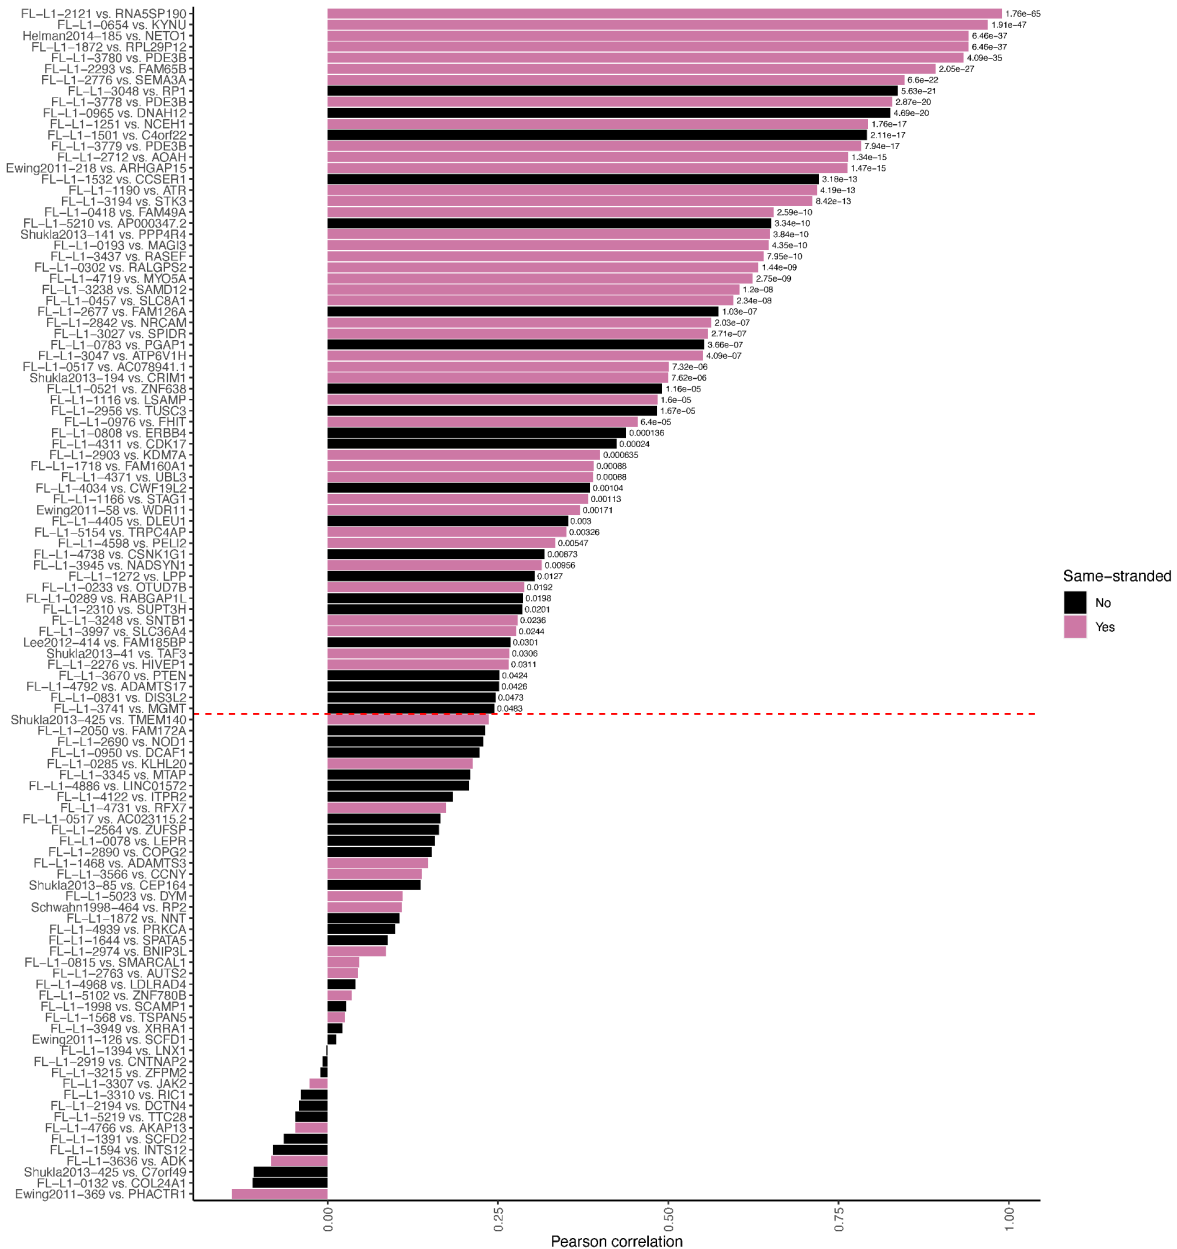

**Supplementary Figure 2.** Pearson's correlation coefficients between L1s and their host genes from highest to lowest. Each bar represents the correlation coefficient between a single L1-host pair, calculated based on their mean expression per sample per cell type. Numbers next to bars indicate false discovery rate -adjusted p-values (FDR). Pairs above the dashed red line are statistically significantly associated (FDR < 0.05).

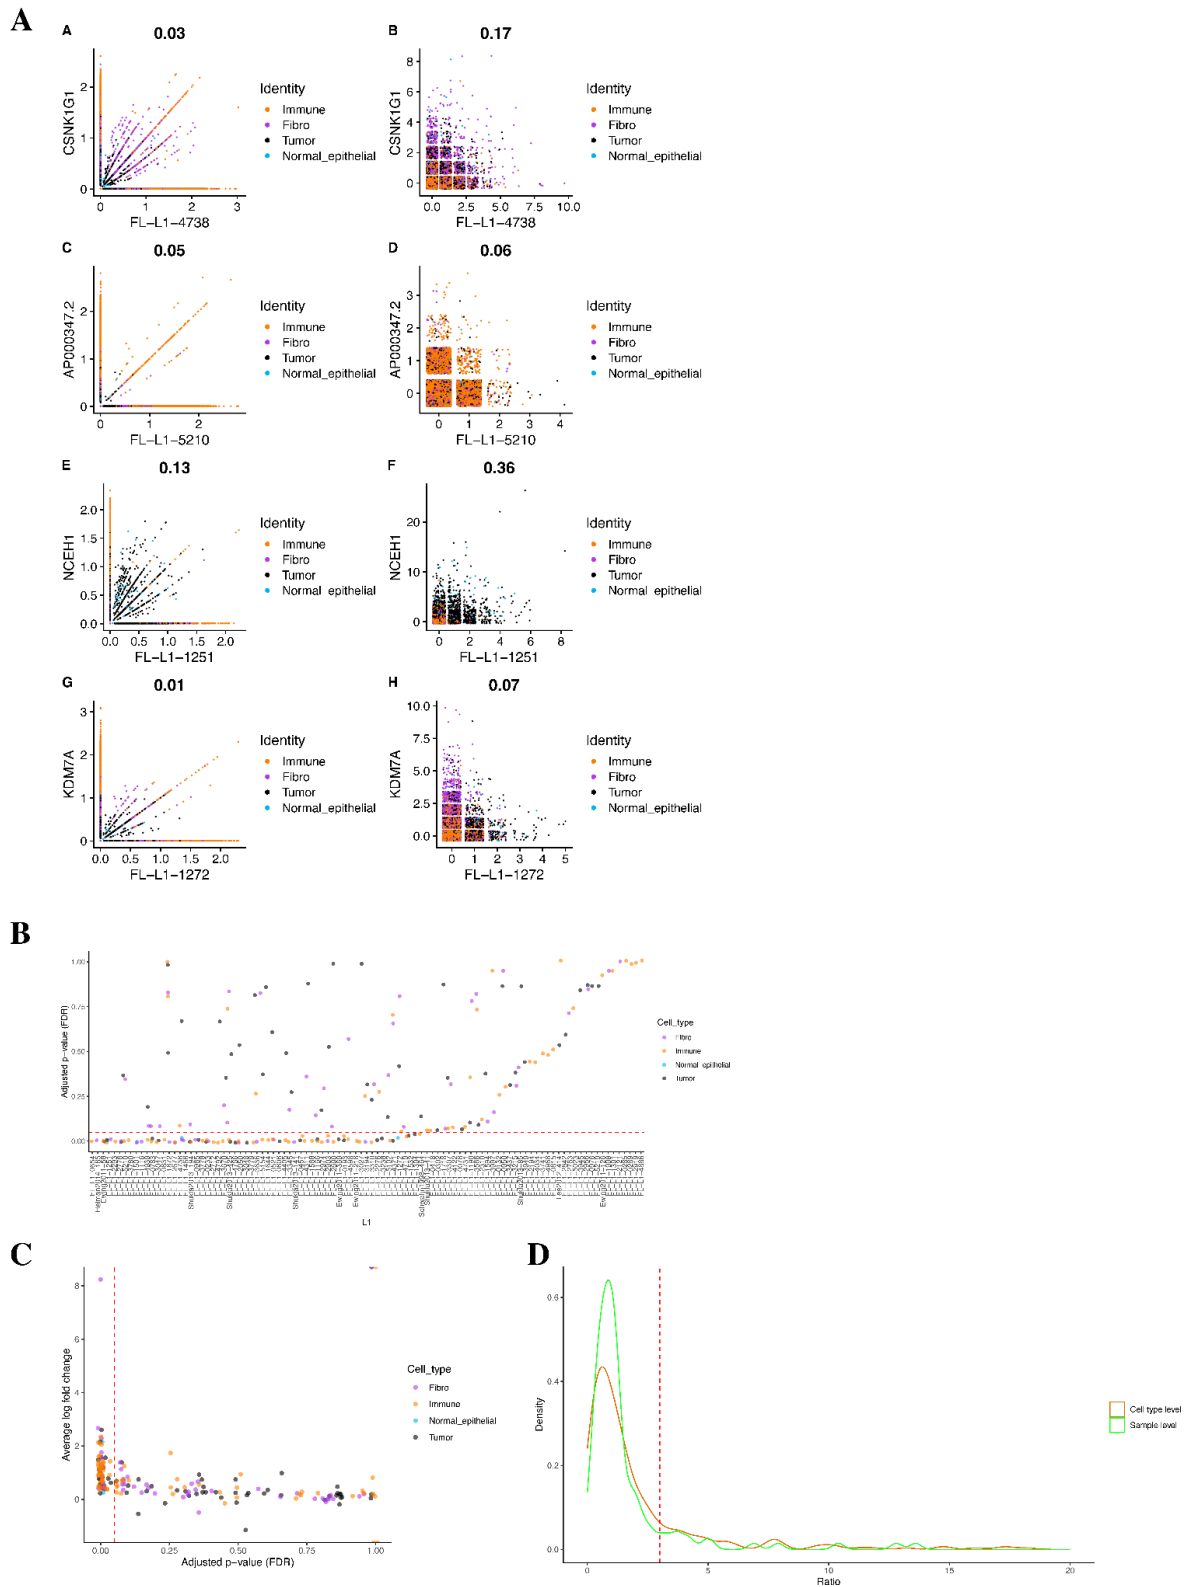

**Supplementary Figure 3. A.** Expression of the four most highly active L1s of scRNA-seq data and their host genes. The graphs on the left (A,C,E,G) are based on log-normalized counts, whereas graphs on the right (B,D,F,H) are based on unnormalized counts. **B.** Adjusted *p*-values of host gene differential expression analysis between cells that do and do not express the resident L1 in question. Dot denotes a host gene in a particular cell type. FDR = false discovery rate. **C.** Differential expression of L1 host genes between cells that do and do not express the corresponding resident L1.

Positive average log fold change values indicate higher host gene expression in the resident L1-expressing cells. **D.** Distribution of mean expression ratios between tumor and normal samples ('Sample level'), as well as between cancer cells and other cell types ('Cell type level'). A single value corresponds to a single L1 locus. Dashed red line indicates the selected threshold for the enrichment (3:1).

A)

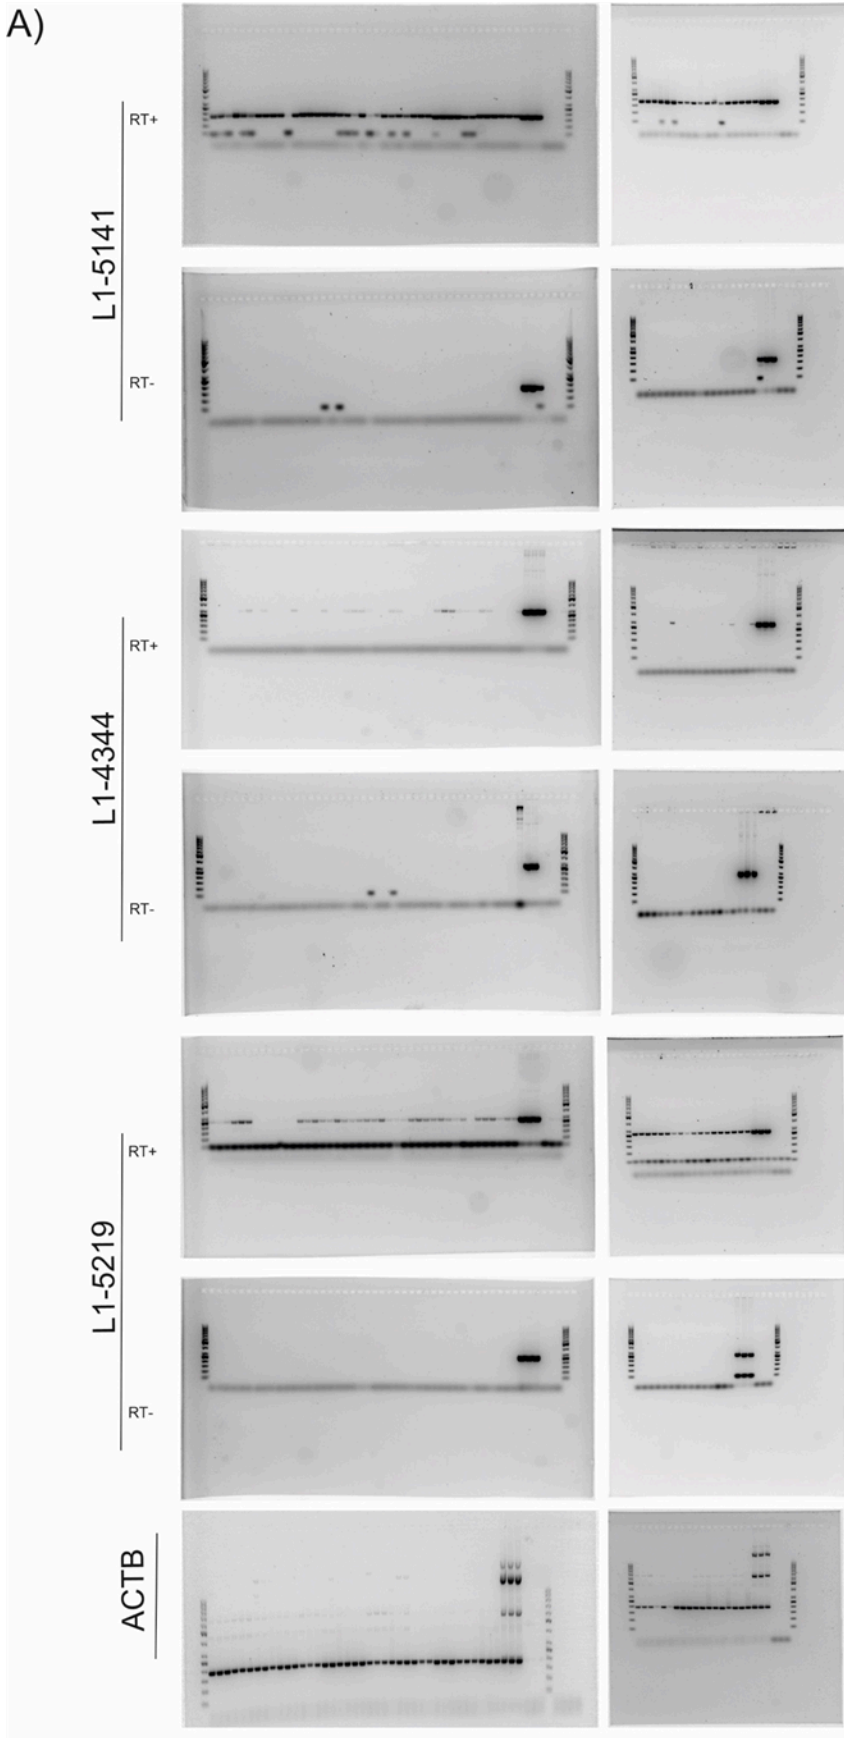

B)

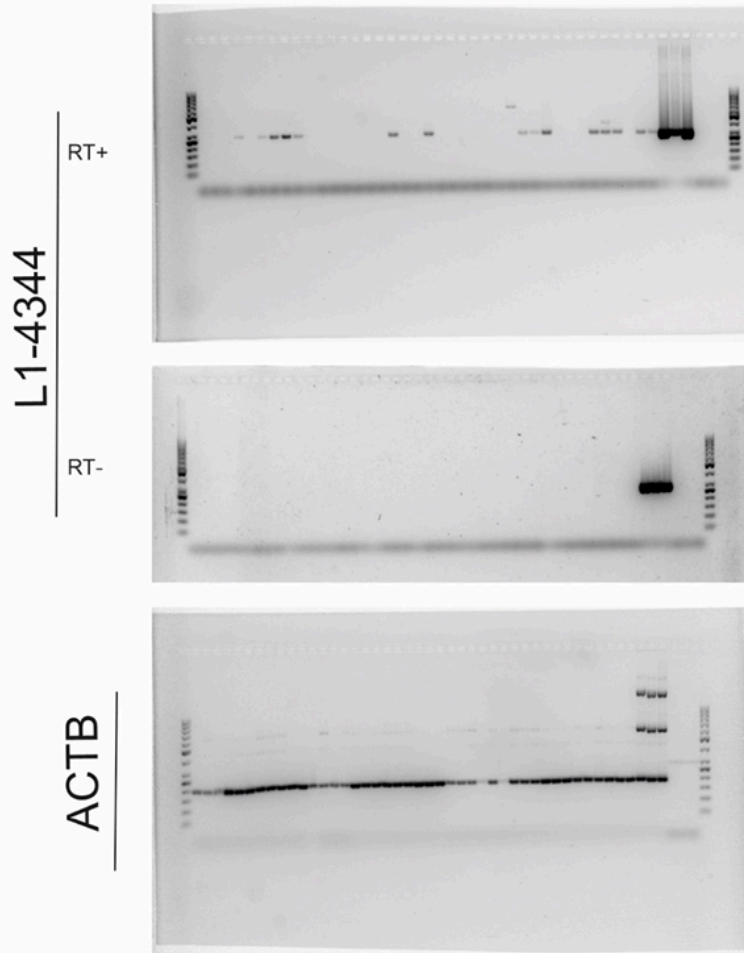

**Supplementary Figure 4.** *Uncropped images of agarose gels shown in A) Figure 3 and B) Supplementary Figure 5.*

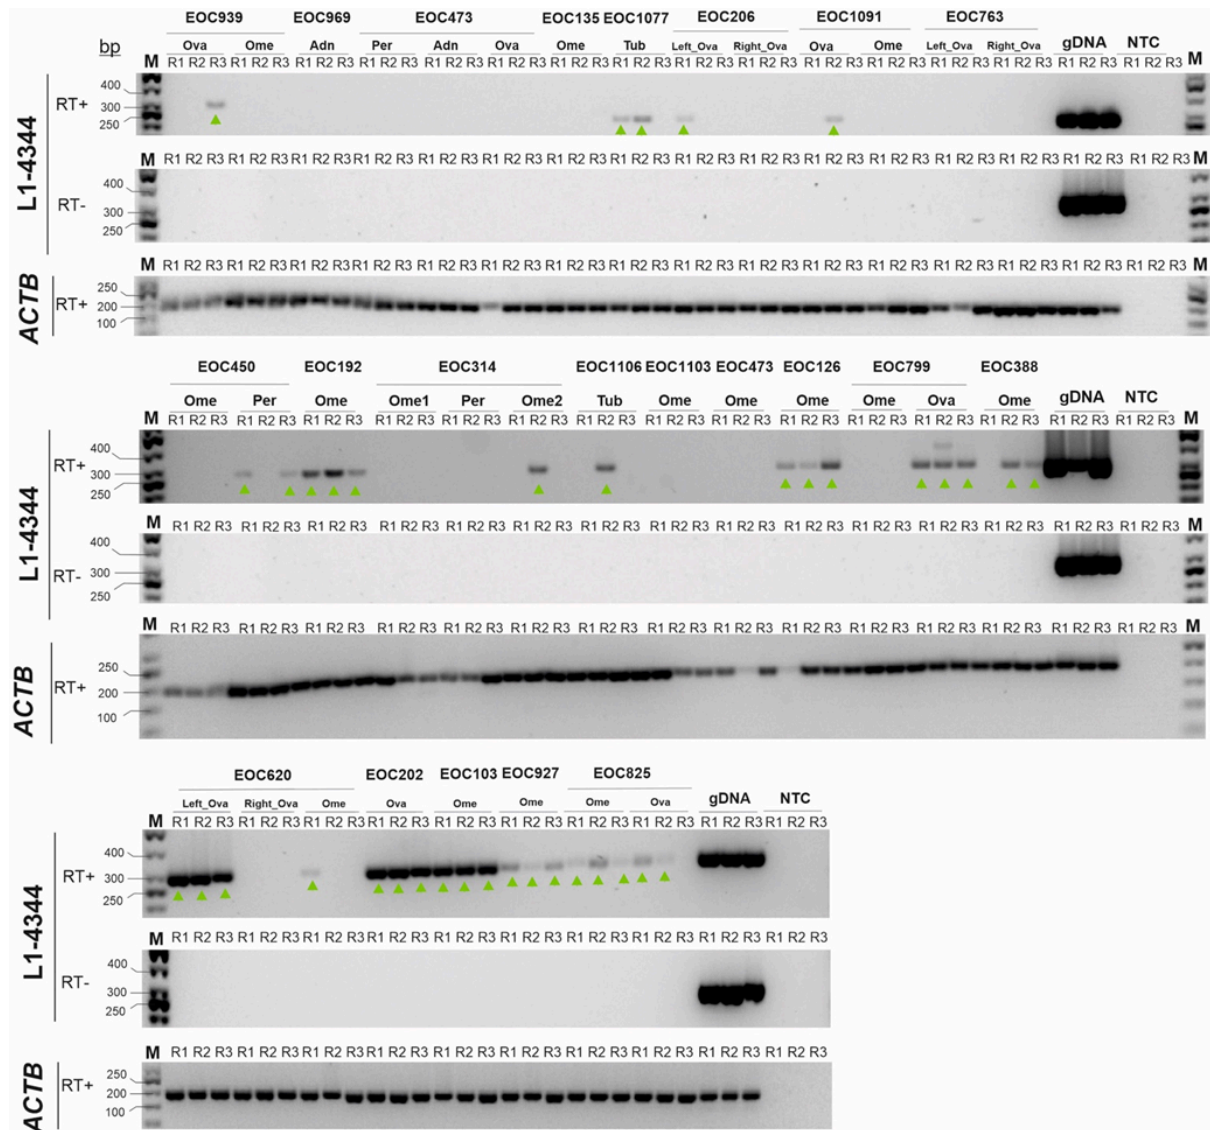

**Supplementary Figure 5.** Locus-specific RT-PCR to detect expression of L1-4344 in an independent HGSOc patient cohort. Agarose gel image is shown with inverted colors (white-on-black) for ease of visualizing amplification products. RT-PCRs positive for amplification (L1-4344 RT-PCR product is sized 291 bp) are marked with green arrowheads. Genomic DNA was included as a control (lane labeled “gDNA”). RT-PCR with primers against ACTB transcript reports on the integrity of RNA samples. Abbreviations: R1,R2 & R3 = replicate 1, 2 & 3 respectively; p = primary (pre-chemotherapy); i = interval (post-chemotherapy); gDNA = genomic DNA; NTC = no template control; M = GeneRuler™ 50 bp DNA ladder, Thermo Scientific™; anatomical sites of tumor sample origin: Ova = ovary, Ome = omentum, Per = peritoneum, Adn = Adnexus, Tub = fallopian tube



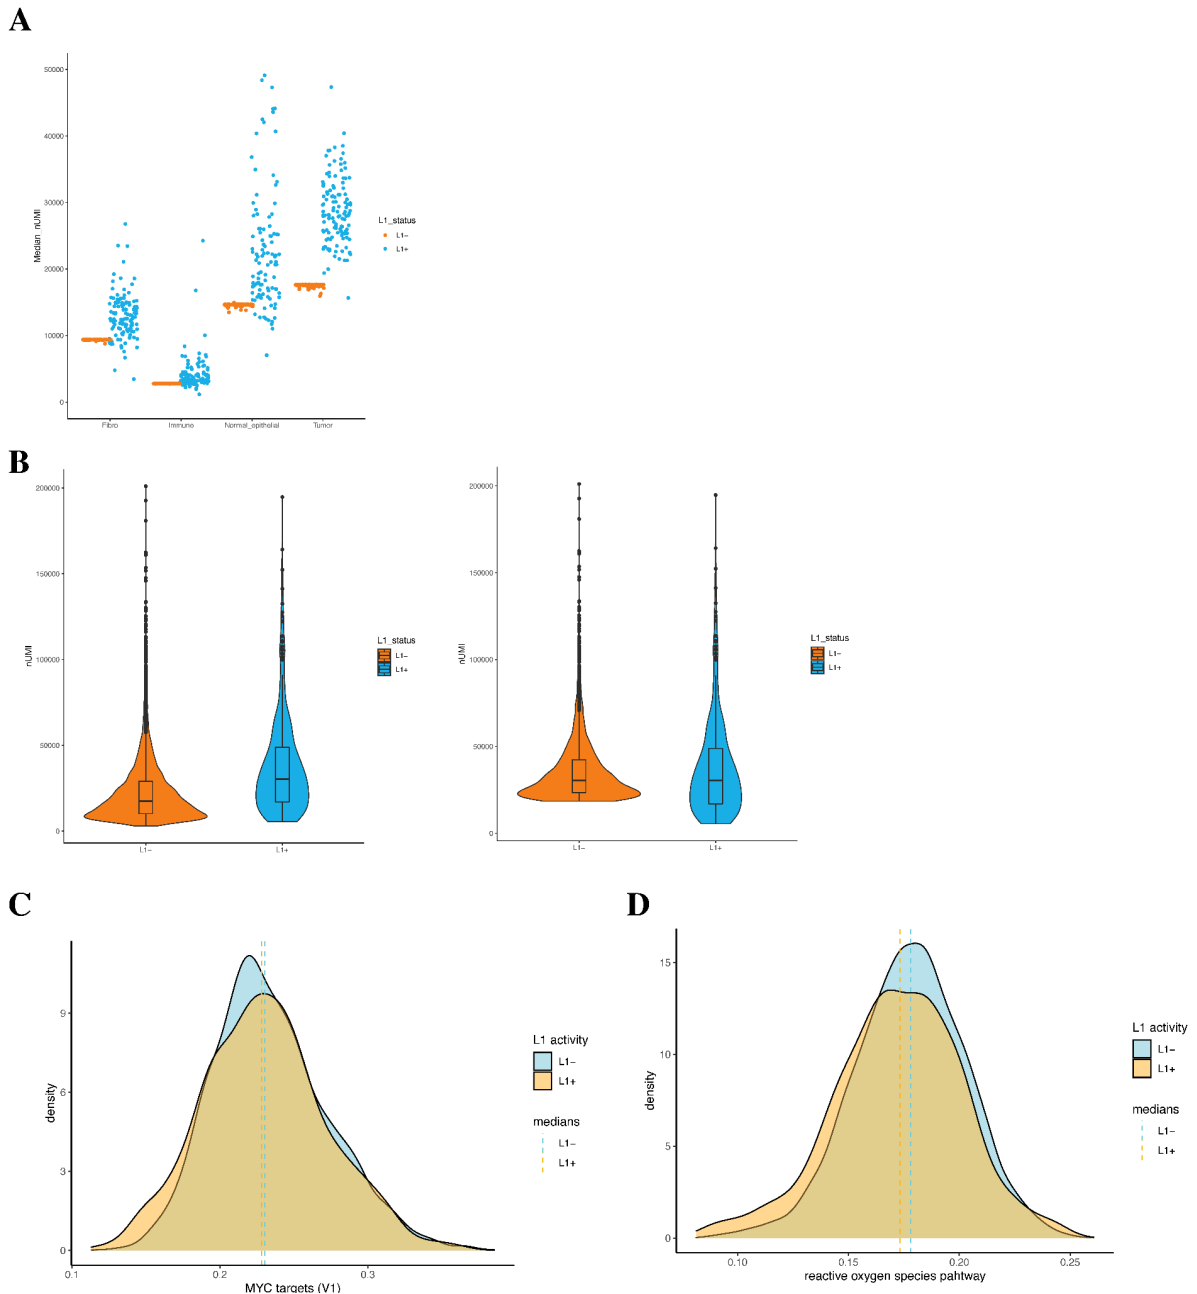

**Supplementary Figure 6. UMI counts differ in L1+ and L1- cells.** **A.** Median UMI count in L1-positive and L1-negative cells (based on the validated L1 loci). One dot denotes a median UMI count in cells that do/do not express a particular L1. **B.** Cell size bias in L1-positivity. Number of UMIs in cancer cells that do (L1+) and do not (L1-) express the validated L1s, FL\_L1-5219 and/or FL\_L1-5141. **C.** Cell size bias in L1-positivity is reduced with the “median matching” procedure. Number of UMIs in subsetted cancer cells that do (L1+) and do not express (L1-) the validated L1s FL\_L1-5219 and/or FL\_L1-5141. Area Under the Curve (AUC) scores for “MYC targets” (**C**) and “Reactive oxygen species pathway” (**D**) hallmark gene sets between L1-positive and L1-negative cells. L1-positivity was assigned based on all the L1s appearing to be genuinely expressed in the scRNA-seq.

**Supplementary Table 1.** Percentiles of the total number of unique molecular identifiers (UMIs) per LI locus, summed from all the samples of the dataset.

| 0% | 25% | 50% | 75% | 95% | 100% |
|----|-----|-----|-----|-----|------|
| 1  | 1   | 4   | 12  | 95  | 7924 |

**Supplementary Table 2.** Features of the top 5% most strongly expressed L1s of the scRNA-seq. Total UMI count = sum of UMIs from all the samples combined; Pearson's  $r/p.adj$  = Pearson's correlation and FDR adjusted  $p$ -value from the L1-host gene expression association analysis; Host expression enrichment in L1+ cells = In which cell types (if any) a host gene is upregulated in the resident L1-expressing cells compared to cells that do not express the resident L1; L1 expression high = Sample/cell types in which an L1 has a minimum of 3-fold enrichment in expression when compared to other sample/cell types; scRNA-seq  $N$  = Number of samples in which an L1 was active in scRNA-seq; Bulk RNA-seq  $N$  = Number of samples in which an L1 was active in bulk RNA-seq.

| L1 ID         | location                  | Total UMI count | host gene(s)             | Pearson's $r/p.adj$ (L1 vs. host) | Host expression enrichment In L1+ cells      | L1 expression high  | scRNA-seq N | Bulk RNA-seq N |
|---------------|---------------------------|-----------------|--------------------------|-----------------------------------|----------------------------------------------|---------------------|-------------|----------------|
| Ewing2011-126 | chr14:30679187-30683088   | 257             | SCFD1 (antisense),       | 0.01/0.94                         | NA                                           | NA                  | 27          | 0              |
|               |                           |                 | UBE2CP1 (same-stranded)  | NA/NA                             | NA                                           |                     |             |                |
| Ewing2011-218 | chr2:143250295-143254196  | 105             | ARHGAP15 (same-stranded) | 0.76/< 0.001                      | Yes (immune cells)                           | Yes (immune cells)  | 24          | 0              |
| Ewing2011-230 | chr2:190611556-190612556  | 158             | NA                       | NA/NA                             | NA                                           | NA                  | 26          | 1              |
| Ewing2011-369 | chr6:13187873-13191774    | 130             | PHACTR1 (same-stranded)  | -0.14/0.29                        | Yes (tumor cells)                            | Yes (fibroblasts)   | 21          | 0              |
| Ewing2011-58  | chr10:120899751-120903652 | 253             | WDR11 (same-stranded)    | 0.37/0.002                        | Yes (tumor cells, immune cells)              | NA                  | 25          | 2              |
| FL-L1-0078    | chr1:65449279-65457309    | 115             | LEPR (antisense)         | 0.16/0.23                         | NA                                           | Yes (tumor samples) | 23          | 0              |
| FL-L1-0132    | chr1:85926070-85934100    | 144             | COL24A1 (antisense)      | -0.11/0.43                        | NA                                           | Yes (tumor samples) | 17          | 1              |
| FL-L1-0193    | chr1:113496220-113504257  | 281             | MAGI3 (same-stranded)    | 0.65/< 0.001                      | Yes (tumor cells, immune cells)              | NA                  | 25          | 0              |
| FL-L1-0233    | chr1:149951052-149959158  | 899             | OTUD7B (same-stranded)   | 0.29/0.02                         | Yes (tumor cells, fibroblasts, immune cells) | NA                  | 27          | 0              |
| FL-L1-0285    | chr1:173724764-173732872  | 155             | KLHL20 (same-stranded)   | 0.21/0.09                         | NA                                           | NA                  | 27          | 0              |

|            |                          |     |                               |              |                                 |                                               |    |   |
|------------|--------------------------|-----|-------------------------------|--------------|---------------------------------|-----------------------------------------------|----|---|
| FL-L1-0289 | chr1:174589352-174597377 | 229 | RABGAP1L (antisense)          | 0.29/0.02    | NA                              | Yes (normal samples)                          | 23 | 0 |
| FL-L1-0302 | chr1:178836557-178844666 | 141 | RALGPS2 (same-stranded)       | 0.63/< 0.001 | NA                              | NA                                            | 24 | 1 |
| FL-L1-0418 | chr2:16592725-16600755   | 184 | FAM49A (same-stranded)        | 0.65/< 0.001 | NA                              | Yes (immune cells)                            | 25 | 2 |
| FL-L1-0457 | chr2:40231600-40239627   | 201 | SLC8A1 (same-stranded)        | 0.59/< 0.001 | Yes (tumor cells, immune cells) | NA                                            | 26 | 0 |
|            |                          |     | SLC8A1-AS1 (antisense)        | NA/NA        | NA                              |                                               |    |   |
| FL-L1-0517 | chr2:67188811-67196967   | 100 | AC023115.2 (antisense),       | 0.17/0.21    | NA                              | NA                                            | 22 | 0 |
|            |                          |     | AC078941.1 (same-stranded)    | 0.50/< 0.001 | NA                              |                                               |    |   |
| FL-L1-0521 | chr2:71410474-71418501   | 833 | ZNF638 (antisense)            | 0.49/< 0.001 | Yes (fibroblasts, immune cells) | NA                                            | 27 | 0 |
| FL-L1-0585 | chr2:110411395-110419526 | 153 | AC108938.5 (same-stranded)    | NA/NA        | NA                              | Yes (normal samples, normal epithelial cells) | 22 | 0 |
|            |                          |     | RP13-1039J1.2 (same-stranded) | NA/NA        | NA                              |                                               |    |   |
|            |                          |     | RP13-1039J1.4 (same-stranded) | NA/NA        | NA                              |                                               |    |   |
| FL-L1-0654 | chr2:143005044-143013076 | 742 | KYNU (same-stranded)          | 0.97/< 0.001 | Yes (immune cells)              | Yes (tumor samples, immune cells)             | 27 | 0 |
| FL-L1-0690 | chr2:157396599-157397599 | 150 | NA                            | NA/NA        | NA                              | Yes (immune cells)                            | 23 | 0 |
| FL-L1-0783 | chr2:196904589-196912619 | 702 | PGAP1 (antisense)             | 0.55/< 0.001 | Yes (tumor cells, immune cells) | NA                                            | 27 | 0 |
| FL-L1-0808 | chr2:212053824-212061959 | 97  | ERBB4 (antisense)             | 0.44/< 0.001 | Yes (tumor cells)               | NA                                            | 18 | 0 |

|            |                          |      |                           |               |                                 |                                               |    |   |
|------------|--------------------------|------|---------------------------|---------------|---------------------------------|-----------------------------------------------|----|---|
| FL-L1-0815 | chr2:216453724-216461842 | 113  | SMARCAL1 (same-stranded)  | 0.05/0.78     | NA                              | NA                                            | 24 | 0 |
| FL-L1-0831 | chr2:232148196-232156229 | 136  | DIS3L2 (antisense)        | 0.25/0.05     | Yes (immune cells)              | NA                                            | 25 | 0 |
| FL-L1-0950 | chr3:51454920-51463072   | 544  | DCAF1 (antisense)         | 0.22/0.08     | NA                              | NA                                            | 27 | 0 |
| FL-L1-0965 | chr3:57475938-57484084   | 263  | DNAH12 (antisense)        | 0.83/< 0.001  | Yes (tumor cells, fibro cells)  | Yes (normal samples, normal epithelial cells) | 27 | 0 |
| FL-L1-0976 | chr3:60959425-60967566   | 129  | FHIT (same-stranded)      | 0.45/< 0.001  | NA                              | NA                                            | 21 | 0 |
| FL-L1-1112 | chr3:112730267-112731267 | 295  | NA                        | NA/NA         | NA                              | Yes (tumor samples, tumor cells)              | 18 | 0 |
| FL-L1-1116 | chr3:116202385-116210424 | 174  | LSAMP (same-stranded)     | 0.48/< 0.001  | Yes (fibroblasts)               | Yes (tumor samples, fibroblasts)              | 21 | 0 |
| FL-L1-1125 | chr3:119562180-119563180 | 303  | NA                        | NA/NA         | NA                              | Yes (tumor samples, immune cells)             | 24 | 1 |
| FL-L1-1139 | chr3:125848810-125856962 | 470  | ENPP7P4 (same-stranded)   | NA/NA         | NA                              | NA                                            | 27 | 0 |
|            |                          |      | RP11-379B18.5 (antisense) | NA/NA         | NA                              |                                               |    |   |
| FL-L1-1148 | chr3:132370232-132371232 | 130  | NA                        | NA/NA         | NA                              | NA                                            | 22 | 0 |
| FL-L1-1166 | chr3:136478078-136486101 | 217  | STAG1 (same-stranded)     | 0.38/0.001    | Yes (tumor cells, immune cells) | NA                                            | 27 | 1 |
| FL-L1-1190 | chr3:142474105-142482225 | 640  | ATR (same-stranded)       | 0.72/< 0.001  | NA                              | NA                                            | 27 | 0 |
| FL-L1-1251 | chr3:172658987-172667103 | 2176 | NCEH1 (same-stranded)     | 0.79/ < 0.001 | Yes (all cell types)            | NA                                            | 27 | 0 |
| FL-L1-1272 | chr3:188371709-188379858 | 2004 | LPP (antisense)           | 0.30/0.01     | Yes (normal epithelial cells)   | NA                                            | 27 | 0 |

|            |                          |     |                               |              |                                            |                                               |    |   |
|------------|--------------------------|-----|-------------------------------|--------------|--------------------------------------------|-----------------------------------------------|----|---|
| FL-L1-1391 | chr4:53327731-5335762    | 129 | SCFD2 (antisense)             | -0.06/0.67   | NA                                         | NA                                            | 23 | 0 |
| FL-L1-1394 | chr4:53465373-53473500   | 189 | LNK1 (antisense),             | -0.002/0.98  | Yes (tumor cells)                          | NA                                            | 25 | 1 |
|            |                          |     | RP11-231C18.3 (same-stranded) | NA/NA        | NA                                         |                                               |    |   |
| FL-L1-1468 | chr4:72513834-72521993   | 111 | ADAMTS3 (same-stranded)       | 0.15/0.27    | Yes (fibroblasts)                          | Yes (fibroblasts)                             | 17 | 0 |
| FL-L1-1501 | chr4:80668983-80677169   | 301 | C4orf22 (antisense)           | 0.79/< 0.001 | Yes (normal epithelial cells, fibroblasts) | Yes (normal samples, normal epithelial cells) | 24 | 0 |
| FL-L1-1532 | chr4:90478376-90486523   | 95  | CCSER1 (antisense)            | 0.72/< 0.001 | Yes (tumor cells)                          | Yes (normal epithelial cells)                 | 20 | 0 |
| FL-L1-1568 | chr4:98591435-98599461   | 97  | TSPAN5 (same-stranded)        | 0.03/0.86    | Yes (immune cells)                         | NA                                            | 24 | 0 |
| FL-L1-1594 | chr4:105879181-105887196 | 198 | INTS12 (antisense)            | -0.08/0.57   | NA                                         | Yes (normal epithelial cells)                 | 25 | 1 |
| FL-L1-1644 | chr4:122938633-122946796 | 257 | SPATA5 (antisense)            | 0.09/0.54    | Yes (immune cells)                         | NA                                            | 27 | 0 |
| FL-L1-1718 | chr4:151510300-151518459 | 359 | FAM160A1 (same-stranded)      | 0.39/< 0.001 | NA                                         | NA                                            | 25 | 0 |
| FL-L1-1867 | chr5:42937866-42938866   | 254 | NA                            | NA/NA        | NA                                         | Yes (normal samples)                          | 21 | 0 |
| FL-L1-1872 | chr5:43666275-43674422   | 464 | NNT (antisense),              | 0.11/0.44    | NA                                         | NA                                            | 27 | 0 |
|            |                          |     | RPL29P12 (same-stranded)      | 0.94/< 0.001 | Yes (fibroblasts)                          |                                               |    |   |
| FL-L1-1998 | chr5:78434233-78442331   | 155 | SCAMP1 (antisense)            | 0.03/0.86    | NA                                         | NA                                            | 21 | 0 |
| FL-L1-2050 | chr5:93760070-93768199   | 820 | FAM172A (antisense)           | 0.23/0.06    | Yes (fibroblasts, immune cells)            | NA                                            | 27 | 0 |
| FL-L1-2121 | chr5:119438179-119446196 | 137 | RNA5SP190 (same-stranded)     | 0.99/< 0.001 | NA                                         | Yes (tumor samples, fibroblasts)              | 21 | 0 |

|            |                          |      |                         |              |                                 |                                    |    |   |
|------------|--------------------------|------|-------------------------|--------------|---------------------------------|------------------------------------|----|---|
| FL-L1-2166 | chr5:132519996-132520996 | 140  | NA                      | NA/NA        | NA                              | NA                                 | 24 | 4 |
| FL-L1-2194 | chr5:150741837-150749950 | 190  | DCTN4 (antisense)       | -0.04/0.79   | NA                              | NA                                 | 25 | 0 |
| FL-L1-2276 | chr6:12138368-12146531   | 169  | HIVEP1 (same-stranded)  | 0.27/0.03    | Yes (tumor cells)               | NA                                 | 27 | 6 |
| FL-L1-2293 | chr6:24810678-24818704   | 514  | FAM65B (same-stranded)  | 0.89/< 0.001 | Yes (immune cells)              | Yes (normal samples)               | 26 | 1 |
| FL-L1-2310 | chr6:44869634-44877665   | 180  | AL161905.1 (antisense), | NA/NA        | NA                              | NA                                 | 24 | 0 |
|            |                          |      | SUPT3H (antisense)      | 0.29/0.02    | NA                              |                                    |    |   |
| FL-L1-2564 | chr6:116637699-116645834 | 111  | ZUFSP (antisense)       | 0.16/0.21    | NA                              | NA                                 | 25 | 0 |
| FL-L1-2677 | chr7:22923196-22931356   | 296  | FAM126A (antisense)     | 0.57/< 0.001 | Yes (fibroblasts, immune cells) | NA                                 | 27 | 0 |
| FL-L1-2690 | chr7:30438244-30446274   | 878  | NOD1 (antisense)        | 0.23/0.07    | Yes (immune cells)              | NA                                 | 27 | 0 |
| FL-L1-2712 | chr7:36551968-36560126   | 107  | AOAH (same-stranded)    | 0.76/< 0.001 | Yes (immune cells)              | Yes (normal samples, immune cells) | 17 | 2 |
| FL-L1-2763 | chr7:70196331-70204357   | 139  | AUTS2 (same-stranded)   | 0.04/0.78    | NA                              | NA                                 | 23 | 0 |
| FL-L1-2776 | chr7:83988325-83996342   | 552  | SEMA3A (same-stranded)  | 0.85/< 0.001 | Yes (tumor cells, fibroblasts)  | NA                                 | 24 | 0 |
| FL-L1-2842 | chr7:108386569-108394721 | 118  | NRCAM (same-stranded)   | 0.56/< 0.001 | NA                              | NA                                 | 18 | 0 |
| FL-L1-2890 | chr7:130576798-130584457 | 96   | COPG2 (antisense)       | 0.15/0.25    | NA                              | Yes (tumor samples)                | 23 | 0 |
| FL-L1-2903 | chr7:140102318-140110394 | 1049 | KDM7A (same-stranded)   | 0.40/< 0.001 | Yes (fibroblasts, immune cells) | NA                                 | 27 | 0 |
| FL-L1-2919 | chr7:147841591-147849620 | 159  | CNTNAP2 (antisense)     | -0.008/0.95  | NA                              | NA                                 | 8  | 3 |

|            |                              |      |                              |               |                                       |                                                           |    |   |
|------------|------------------------------|------|------------------------------|---------------|---------------------------------------|-----------------------------------------------------------|----|---|
| FL-L1-2956 | chr8:15555008-1<br>5563026   | 222  | TUSC3<br>(antisense)         | 0.48/< 0.001  | NA                                    | NA                                                        | 26 | 0 |
| FL-L1-2974 | chr8:26394612-2<br>6402579   | 542  | BNIP3L<br>(same-stranded)    | 0.09/0.55     | Yes (immune)                          | NA                                                        | 27 | 0 |
| FL-L1-3027 | chr8:47483871-4<br>7492006   | 429  | SPIDR<br>(same-stranded)     | 0.56/ < 0.001 | Yes (immune<br>cells)                 | NA                                                        | 27 | 0 |
| FL-L1-3030 | chr8:48333021-4<br>8334021   | 294  | NA                           | NA/NA         | NA                                    | Yes (tumor<br>samples)                                    | 12 | 0 |
| FL-L1-3047 | chr8:53779543-5<br>3787666   | 802  | ATP6V1H<br>(same-stranded)   | 0.55/< 0.001  | Yes (tumor<br>cells, immune<br>cells) | NA                                                        | 27 | 0 |
| FL-L1-3048 | chr8:54579988-5<br>4588142   | 207  | RP1 (antisense)              | 0.84/< 0.001  | Yes (tumor<br>cells)                  | Yes (normal<br>samples,<br>normal<br>epithelial<br>cells) | 26 | 0 |
| FL-L1-3194 | chr8:98693365-9<br>8701518   | 1114 | STK3<br>(same-stranded)      | 0.71/< 0.001  | Yes (fibroblasts)                     | NA                                                        | 27 | 0 |
| FL-L1-3215 | chr8:105788089-<br>105796234 | 370  | ZFPM2<br>(antisense),        | -0.01/0.94    | NA                                    | NA                                                        | 21 | 0 |
|            |                              |      | ZFPM2-AS1<br>(same-stranded) | NA/NA         | NA                                    |                                                           |    |   |
| FL-L1-3238 | chr8:118530003-<br>118537089 | 128  | SAMD12<br>(same-stranded)    | 0.60/< 0.001  | Yes (tumor<br>cells)                  | Yes (tumor<br>samples,<br>tumor cells)                    | 24 | 3 |
| FL-L1-3248 | chr8:120643161-<br>120651187 | 100  | SNTB1<br>(same-stranded)     | 0.28/0.02     | NA                                    | NA                                                        | 24 | 0 |
| FL-L1-3307 | chr9:5030773-50<br>38865     | 334  | JAK2<br>(same-stranded)      | -0.03/0.86    | NA                                    | NA                                                        | 26 | 1 |
| FL-L1-3310 | chr9:5721562-57<br>29670     | 708  | RIC1 (antisense)             | -0.04/0.80    | Yes (immune<br>cells)                 | NA                                                        | 27 | 0 |
| FL-L1-3345 | chr9:21818140-2<br>1826239   | 1295 | MTAP<br>(antisense),         | 0.21/0.10     | Yes (immune<br>cells)                 | NA                                                        | 27 | 0 |
|            |                              |      | RP11-145E5.5<br>(antisense)  | NA/NA         | NA                                    |                                                           |    |   |
| FL-L1-3437 | chr9:83048539-8<br>3056569   | 235  | RASEF<br>(same-stranded)     | 0.64/< 0.001  | NA                                    | NA                                                        | 21 | 1 |
| FL-L1-3566 | chr10:35472782-<br>35480771  | 325  | CCNY<br>(same-stranded)      | 0.14/0.30     | NA                                    | NA                                                        | 27 | 0 |



|            |                           |      |                              |              |                    |                                  |    |   |
|------------|---------------------------|------|------------------------------|--------------|--------------------|----------------------------------|----|---|
| FL-L1-3636 | chr10:74215882-74224021   | 384  | ADK (same-stranded)          | -0.08/0.56   | Yes (fibroblasts)  | NA                               | 27 | 4 |
| FL-L1-3645 | chr10:78094479-78095479   | 136  | NA                           | NA/NA        | NA                 | NA                               | 21 | 1 |
| FL-L1-3670 | chr10:87896804-87904979   | 1292 | PTEN (antisense)             | 0.25/0.04    | Yes (immune cells) | NA                               | 27 | 0 |
| FL-L1-3721 | chr10:111049281-111050281 | 246  | NA                           | NA/NA        | NA                 | Yes (tumor samples)              | 25 | 0 |
| FL-L1-3741 | chr10:129731560-129739580 | 107  | MGMT (antisense)             | 0.24/0.05    | NA                 | Yes (normal samples)             | 20 | 0 |
| FL-L1-3767 | chr11:9539333-9540333     | 127  | NA                           | NA/NA        | NA                 | NA                               | 21 | 0 |
| FL-L1-3778 | chr11:14660329-14668447   | 178  | PDE3B (same-stranded)        | 0.83/< 0.001 | Yes (immune cells) | Yes (immune cells)               | 24 | 3 |
| FL-L1-3779 | chr11:14714908-14722938   | 181  | PDE3B (same-stranded)        | 0.78/< 0.001 | Yes (immune cells) | Yes (immune cells)               | 23 | 6 |
| FL-L1-3780 | chr11:14776675-14784773   | 521  | PDE3B (same-stranded)        | 0.93/< 0.001 | Yes (immune cells) | Yes (immune cells)               | 26 | 8 |
| FL-L1-3945 | chr11:71510047-71518198   | 96   | NADSYN1 (same-stranded)      | 0.31/0.01    | NA                 | NA                               | 22 | 0 |
| FL-L1-3949 | chr11:74886437-74894565   | 153  | RP11-14713.1 (same-stranded) | NA/NA        | NA                 | NA                               | 25 | 2 |
|            |                           |      | XRRA1 (antisense)            | 0.02/0.88    | NA                 |                                  |    |   |
| FL-L1-3997 | chr11:93171447-93179521   | 178  | RP11-573M3.2 (antisense),    | NA/NA        | NA                 | NA                               | 23 | 0 |
|            |                           |      | SLC36A4 (same-stranded)      | 0.27/0.02    | NA                 |                                  |    |   |
| FL-L1-4034 | chr11:107371762-107379780 | 213  | CWF19L2 (antisense)          | 0.38/0.001   | NA                 | Yes (normal samples)             | 26 | 0 |
| FL-L1-4122 | chr12:26668557-26676709   | 179  | ITPR2 (antisense)            | 0.18/0.15    | NA                 | NA                               | 27 | 0 |
| FL-L1-4311 | chr12:96314944-96322971   | 451  | CDK17 (antisense)            | 0.42/< 0.001 | Yes (immune cells) | NA                               | 27 | 0 |
| FL-L1-4344 | chr12:126298010-126306038 | 103  | RP4-809F18.1 (antisense)     | NA/NA        | NA                 | Yes (tumor samples, fibroblasts) | 10 | 0 |

|            |                           |      |                           |              |                                            |                     |    |    |
|------------|---------------------------|------|---------------------------|--------------|--------------------------------------------|---------------------|----|----|
| FL-L1-4371 | chr13:29822715-29830837   | 337  | UBL3 (same-stranded)      | 0.39/< 0.001 | Yes (tumor cells)                          | NA                  | 27 | 0  |
| FL-L1-4405 | chr13:50179295-50187327   | 174  | DLEU1 (antisense)         | 0.35/0.003   | Yes (immune cells)                         | Yes (tumor samples) | 24 | 3  |
| FL-L1-4598 | chr14:56227636-56235747   | 198  | PELI2 (same-stranded)     | 0.33/0.006   | Yes (immune cells)                         | NA                  | 27 | 0  |
| FL-L1-4634 | chr14:70546296-70554322   | 176  | RP11-486O13.4 (antisense) | NA/NA        | NA                                         | NA                  | 21 | 0  |
| FL-L1-4719 | chr15:52471398-52479553   | 496  | MYO5A (same-stranded)     | 0.62/< 0.001 | Yes (immune cells)                         | Yes (immune cells)  | 27 | 1  |
| FL-L1-4731 | chr15:56133618-56141628   | 142  | RFX7 (same-stranded)      | 0.17/0.18    | NA                                         | NA                  | 25 | 2  |
| FL-L1-4738 | chr15:64325660-64333700   | 7924 | CSNK1G1 (antisense),      | 0.32/0.009   | Yes (normal epithelial cells, fibroblasts) | NA                  | 27 | 0  |
|            |                           |      | CTD-2116N17.1 (antisense) | NA/NA        | NA                                         |                     |    |    |
| FL-L1-4766 | chr15:85432963-85440965   | 156  | AKAP13 (same-stranded)    | -0.05/0.78   | Yes (tumor cells)                          | NA                  | 27 | 1  |
| FL-L1-4792 | chr15:100082863-100090998 | 223  | ADAMTS17 (antisense)      | 0.25/0.04    | Yes (immune cells)                         | NA                  | 26 | 0  |
| FL-L1-4811 | chr16:31344038-31345038   | 95   | NA                        | NA/NA        | NA                                         | Yes (tumor samples) | 19 | 0  |
| FL-L1-4815 | chr16:31943726-31944726   | 113  | NA                        | NA/NA        | NA                                         | NA                  | 19 | 0  |
| FL-L1-4886 | chr16:72579798-72587932   | 212  | LINC01572 (antisense)     | 0.21/0.10    | NA                                         | NA                  | 27 | 0  |
| FL-L1-4939 | chr17:66595579-66603592   | 802  | PRKCA (antisense)         | 0.10/0.47    | Yes (immune cells)                         | Yes (tumor samples) | 24 | 0  |
| FL-L1-4968 | chr18:13342089-13350216   | 146  | LDLRAD4 (antisense)       | 0.04/0.79    | NA                                         | NA                  | 26 | 0  |
| FL-L1-5023 | chr18:49101418-49109547   | 293  | DYM (same-stranded)       | 0.11/0.43    | NA                                         | NA                  | 26 | 10 |
| FL-L1-5063 | chr19:12003811-12011812   | 104  | CTD-2006C1.2 (antisense)  | NA/NA        | NA                                         | NA                  | 26 | 3  |
| FL-L1-5102 | chr19:40036915-40045054   | 566  | ZNF780B (same-stranded)   | 0.04/0.82    | Yes (immune cells)                         | NA                  | 27 | 1  |

|                 |                           |      |                               |              |                                 |                                  |    |    |
|-----------------|---------------------------|------|-------------------------------|--------------|---------------------------------|----------------------------------|----|----|
| FL-L1-5141      | chr20:23432140-23433140   | 146  | NA                            | NA/NA        | NA                              | Yes (tumor samples, tumor cells) | 21 | 16 |
| FL-L1-5154      | chr20:35070283-35078389   | 501  | TRPC4AP (same-stranded)       | 0.35/0.003   | Yes (immune cells)              | NA                               | 27 | 0  |
| FL-L1-5210      | chr22:23661983-23670138   | 2336 | AP000347.2 (antisense),       | 0.65/< 0.001 | Yes (immune cells)              | NA                               | 27 | 0  |
|                 |                           |      | GUSBP11 (antisense),          | NA/NA        | NA                              |                                  |    |    |
|                 |                           |      | KB-1572G7.2 (antisense)       | NA/NA        | NA                              |                                  |    |    |
| FL-L1-5219      | chr22:28662285-28670315   | 160  | TTC28 (antisense)             | -0.05/0.78   | NA                              | Yes (tumor samples, tumor cells) | 18 | 18 |
| Helman2014-185  | chr18:72844266-72848167   | 642  | NETO1 (same-stranded)         | 0.94/< 0.001 | Yes (fibroblasts)               | Yes (tumor samples, fibroblasts) | 17 | 3  |
| Lee2012-414     | chr7:77091735-77095636    | 323  | FAM185BP (antisense),         | 0.27/0.03    | NA                              | NA                               | 27 | 0  |
|                 |                           |      | RP11-467H10.2 (same-stranded) | NA/NA        | NA                              |                                  |    |    |
| Schwahn1998-464 | chrX:46834934-46838835    | 211  | RP2 (same-stranded)           | 0.11/0.43    | Yes (immune cells)              | NA                               | 26 | 24 |
| Shukla2013-141  | chr14:94173729-94177630   | 171  | PPP4R4 (same-stranded)        | 0.65/< 0.001 | Yes (fibroblasts)               | NA                               | 25 | 4  |
| Shukla2013-194  | chr2:36389671-36393572    | 1037 | CRIM1 (same-stranded)         | 0.50/< 0.001 | Yes (tumor cells, immune cells) | NA                               | 27 | 1  |
| Shukla2013-41   | chr10:7980124-7984025     | 145  | TAF3 (same-stranded)          | 0.27/0.03    | NA                              | NA                               | 25 | 0  |
| Shukla2013-425  | chr7:135157267-135161168  | 814  | C7orf49 (antisense),          | -0.11/0.43   | NA                              | Yes (immune cells)               | 27 | 23 |
|                 |                           |      | TMEM140 (same-stranded)       | 0.24/0.06    | Yes (tumor cells, immune cells) |                                  |    |    |
| Shukla2013-85   | chr11:117322084-117325985 | 173  | AP000892.4 (same-stranded)    | NA/NA        | NA                              | NA                               | 26 | 0  |
|                 |                           |      | CEP164 (antisense)            | 0.14/0.30    | NA                              |                                  |    |    |

*Supplementary Table 3. Primers used for RT-PCR.*

| <b>Target locus</b> | <b>Primer name</b>    | <b>Sequence (5'-3')</b>        |
|---------------------|-----------------------|--------------------------------|
| L1-5141             | L1_008 (forward)      | AGATATACCTAATGCTAGA<br>TGACACA |
| L1-5141             | L1_54A (reverse)      | GCATCTTATCGACTGGTG<br>CATG     |
| L1-5219             | L1_008 (forward)      | AGATATACCTAATGCTAGA<br>TGACACA |
| L1-5219             | L1_003 (reverse)      | ATTTTGGCCCTAACTGGT<br>CACA     |
| L1-4344             | L1_008 (forward)      | AGATATACCTAATGCTAGA<br>TGACACA |
| L1-4344             | L1_4344_dR2 (reverse) | AACATGTCAACCTGCAGA<br>ACC      |
| ACTB                | MT_126 (forward)      | AGAAAATCTGGCACCACA<br>CC       |
| ACTB                | MT_127 (reverse)      | AGAGGCGTACAGGGATAG<br>CA       |
